# Supplementary material
Source: PubMed Central journal article supplement (PMC8501157)

**Figure S1. Pedigrees analyzed in this study.** Red numbers are individual IDs used in the pVAAST analyses. For family FAM4, blue numbers are individual IDs used in the pVAAST analysis under the recessive mode of inheritance. Unknown: no information on TD/Chronic tic disorder. Presence of (comorbid) obsessive-compulsive disorder (OCD) and/or attention-deficit/hyperactivity disorder (ADHD) is shown.

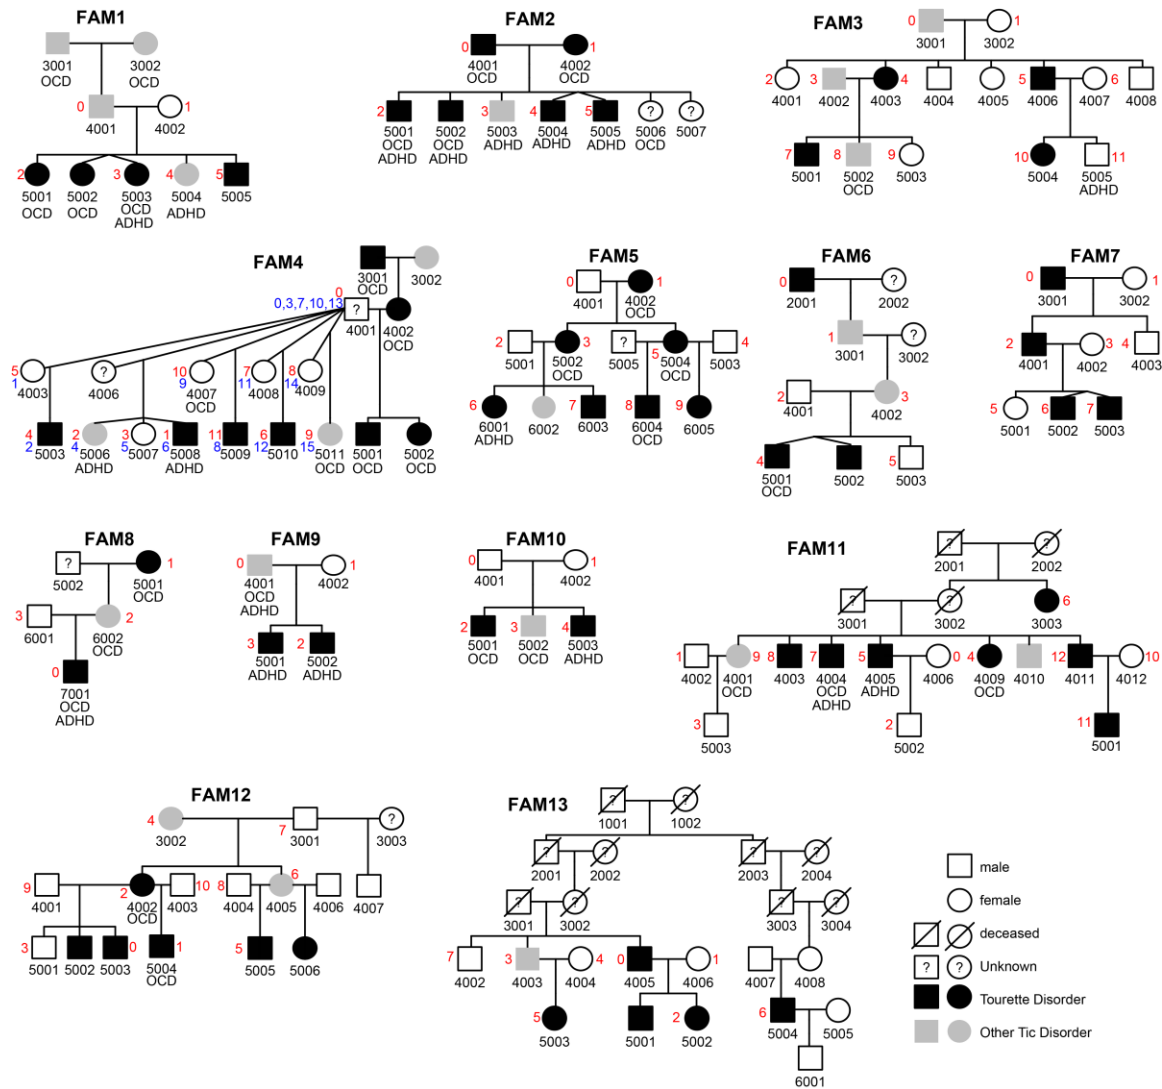

Supplement: NIHMS1689283-supplement-Supplementary_Figure_S1.pdf [file NIHMS1689283-supplement-Supplementary_Figure_S1.pdf]
